CORRECTION

# Correction: Membrane Partitioning of Anionic, Ligand-Coated Nanoparticles Is Accompanied by Ligand Snorkeling, Local Disordering, and Cholesterol Depletion

The *PLOS Computational Biology* Staff

There are some typographical errors in the manuscript. In the Results section of the manuscript, specifically in the paragraph entitled “Partitioning mechanism of a striped anionic NP in lipid bilayers”, it is stated that “We consider an anionic NP with a core diameter of 4.3 nm. . .”. The correct statement should be “We consider an anionic NP with a core diameter of 3 nm. . .”

There is also an error in [S1 Fig](#): the distance between the C1 and the Qa particle is not 0.62 nm as shown in the figure, but 0.47 nm. Please view the correct version of [S1 Fig](#) here:

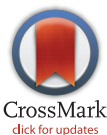

## OPEN ACCESS

**Citation:** The *PLOS Computational Biology* Staff (2016) Correction: Membrane Partitioning of Anionic, Ligand-Coated Nanoparticles Is Accompanied by Ligand Snorkeling, Local Disordering, and Cholesterol Depletion. *PLoS Comput Biol* 12(2): e1004769. doi:10.1371/journal.pcbi.1004769

**Published:** February 17, 2016

**Copyright:** © 2016 The PLOS Computational Biology Staff. This is an open access article distributed under the terms of the [Creative Commons Attribution License](#), which permits unrestricted use, distribution, and reproduction in any medium, provided the original author and source are credited.

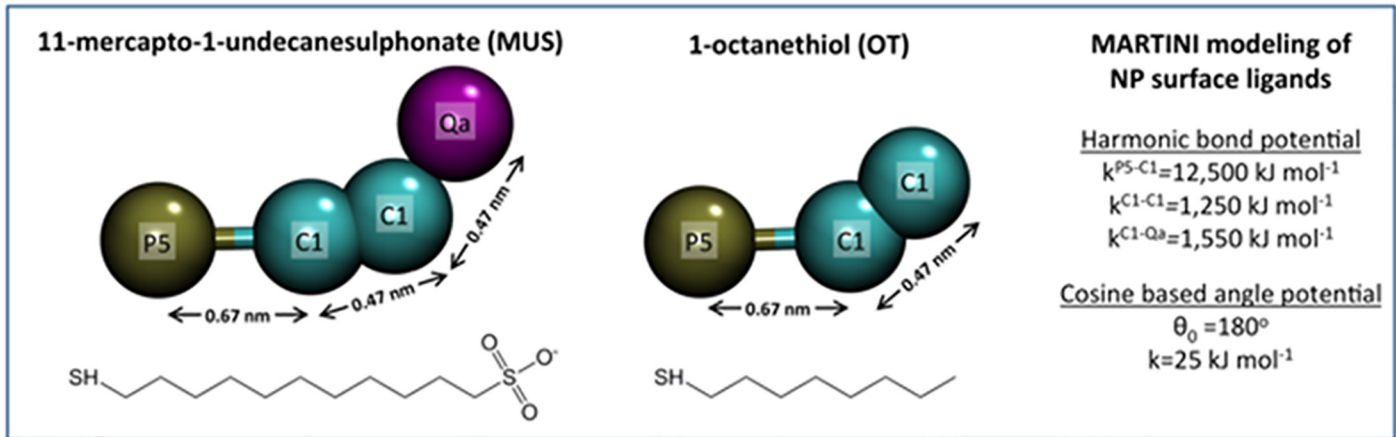

**S1 Fig. Coarse-grained models of the NP surface ligands used in the present study.** Colors: Negative beads bearing  $-1e$  charge (Qa) = purple; hydrophobic beads (C1) = cyan; and polar beads (P5) = ochre. (TIF)

doi:10.1371/journal.pcbi.1004769.g001

## References

1. Gkeka P, Angelikopoulos P, Sarkisov L, Cournia Z (2014) Membrane Partitioning of Anionic, Ligand-Coated Nanoparticles Is Accompanied by Ligand Snorkeling, Local Disordering, and Cholesterol Depletion. *PLoS Comput Biol* 10(12): e1003917. doi: [10.1371/journal.pcbi.1003917](https://doi.org/10.1371/journal.pcbi.1003917) PMID: [25474252](https://pubmed.ncbi.nlm.nih.gov/25474252/)
